# Supplementary material
Source: publisher site journal article supplement (https://www.spandidos-publications.com/977/downloadSupplementary)
Supplement: Supplementary file 1 [file downloadSupplementary]

Figure S1. There was no difference in survival time between Slug-positive and -negative PSCs or between Snail-positive and -negative PSCs. PSC, pulmonary sarcomatoid carcinoma.

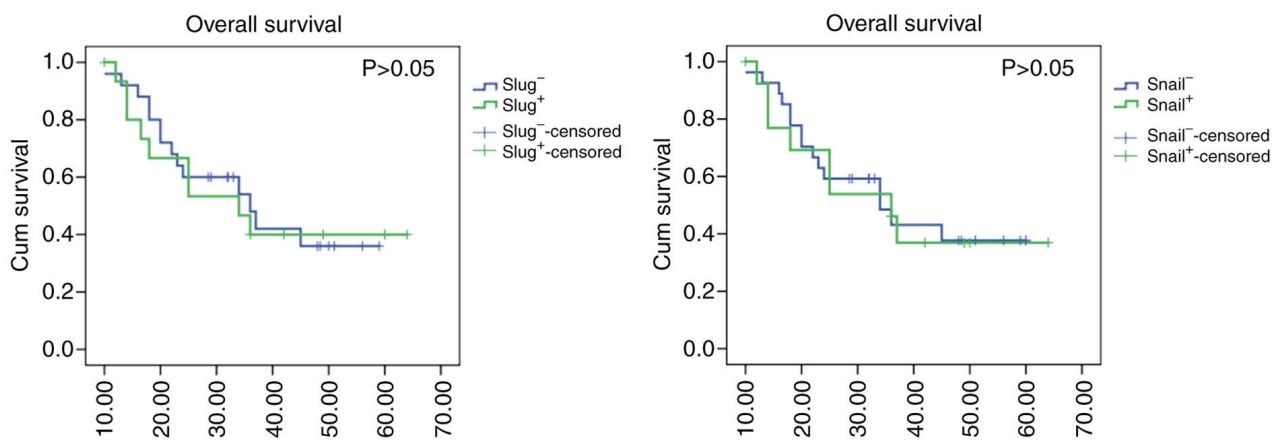

Figure S2. Twist1, Slug and Snail expression did not exhibit a prognostic significance for OS in PSCCs. OS, overall survival; PSCC, pulmonary squamous carcinoma.

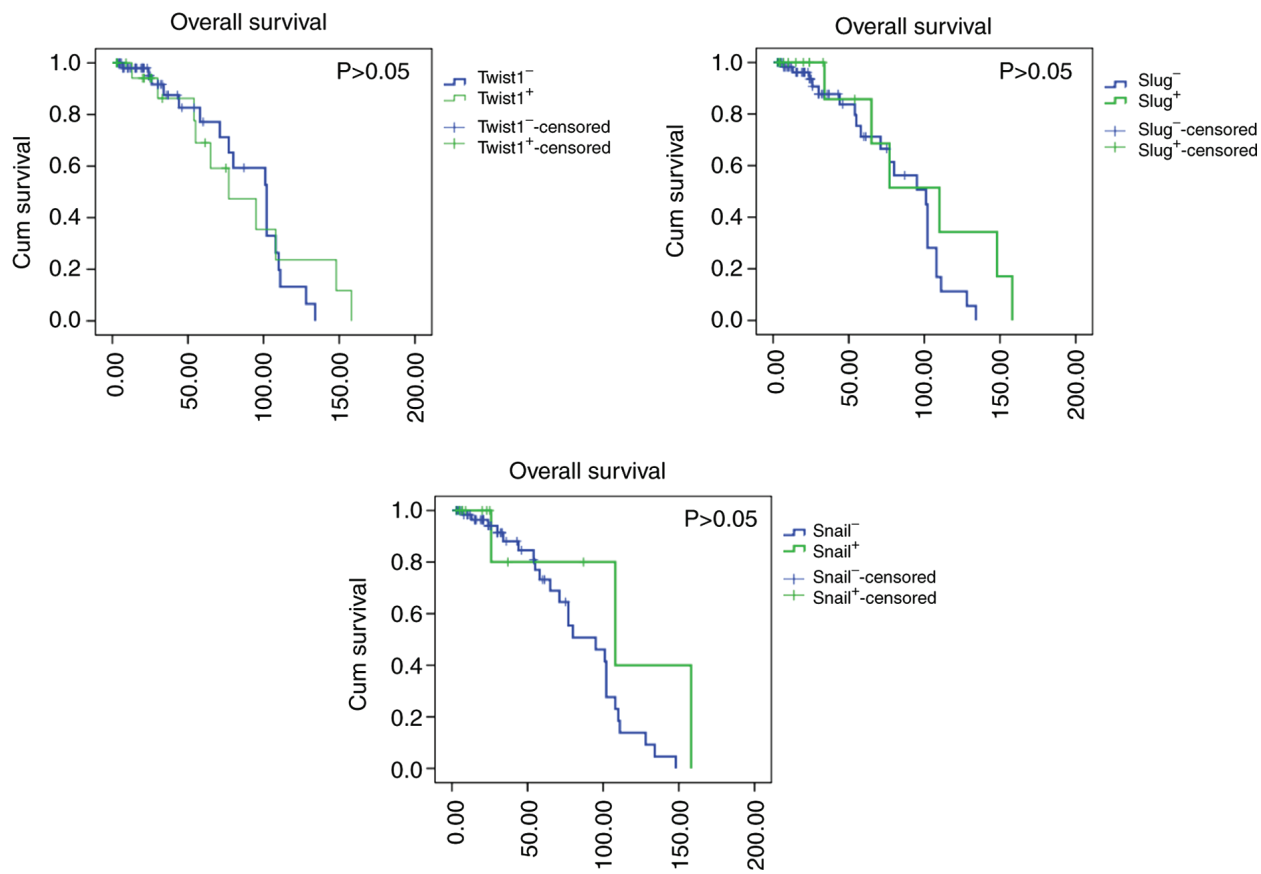

Figure S3. Western blot revealed Twist1 downregulation in SK-MES-1 cells that were cultured under standard conditions following shTwist1 vector transfection.

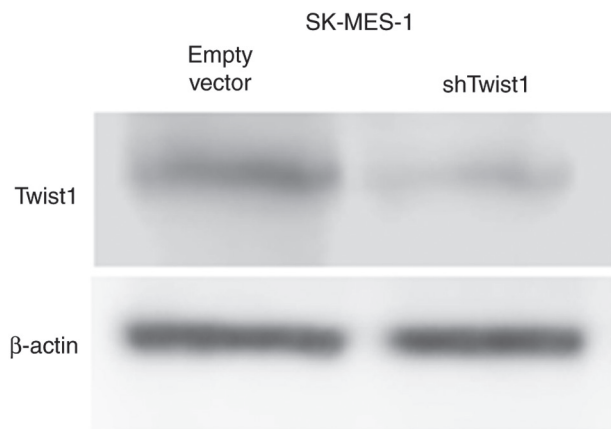

Table SI. Multivariate Cox regression analysis for OS in PSCs and PSCCs.

| Characteristic     | HR    | PSCs         | P-value             | HR    | PSCCs       | P-value            |
|--------------------|-------|--------------|---------------------|-------|-------------|--------------------|
| Sex                |       |              |                     |       |             |                    |
| Male, female       |       |              | 0.575               |       |             |                    |
| Age, years         |       |              |                     |       |             |                    |
| ≥60 and >60        |       |              | 0.851               |       |             |                    |
| Metastasis         | 7.105 | 2.768-18.237 | <0.001 <sup>b</sup> |       |             | 0.827              |
| Yes, no            |       |              |                     |       |             |                    |
| Tumour size        |       |              |                     |       |             |                    |
| ≥5 and <5 cm       |       |              | 0.721               |       |             | 0.994              |
| Stage              |       |              |                     |       |             |                    |
| I, II, III         |       |              | 0.175               | 2.027 | 1.048-3.921 | 0.036 <sup>a</sup> |
| Grade              |       |              |                     |       |             |                    |
| I, II, III         |       |              | NA                  |       |             | 0.742              |
| Twist1 expression  |       |              |                     |       |             |                    |
| Positive, negative | 6.047 | 1.601-22.840 | 0.008 <sup>a</sup>  |       |             | 0.507              |
| Slug expression    |       |              |                     |       |             |                    |
| Positive, negative |       |              | 0.457               |       |             | 0.162              |
| Snail expression   |       |              |                     |       |             |                    |
| Positive, negative |       |              | 0.895               |       |             | 0.742              |

<sup>a</sup>Statistical significance (P<0.05). HR, hazard ratio; NA, not applicable.
